# Supplementary material for: The Experiences of Community Health Workers in Preventing Noncommunicable Diseases in an Urban Area, the Philippines: A Qualitative Study
Source: MDPI journal article supplement (doi:10.3390/healthcare11172424), 2023-08-30
Supplement: s1 [file s1]

## Interview Guide for Baragay Health Workers

| Question                                                                   |                                                                                                        | Probe                                                                            |
|----------------------------------------------------------------------------|--------------------------------------------------------------------------------------------------------|----------------------------------------------------------------------------------|
| I. Consciousness toward the prevention of non-communicable diseases (NCDs) |                                                                                                        |                                                                                  |
| 1.                                                                         | What is your understanding of the NCDs prevention?                                                     | -Please explain your opinions.<br>-Why do you think so?                          |
| 2.                                                                         | Are you willing to prevent NCDs in the community?                                                      | -YES<br>: Why do you think so?<br>-NO<br>: Why don't you think so?               |
| 3.                                                                         | How important do you think the NCDs prevention is?                                                     | -Why do you think so?                                                            |
| II. Activities and roles for the prevention of NCDs                        |                                                                                                        |                                                                                  |
| 1.                                                                         | What are activities of BHWs for the NCDs prevention in the community?                                  | -Please explain more.<br>-Contents, frequency, duration                          |
| 2.                                                                         | How do you deal with the problems or concerns relate to the NCDs prevention in the community?          | -Please explain more.                                                            |
| 3.                                                                         | What are the roles of BHW for the NCDs prevention in the community?                                    | -Please explain more.<br>-Why do you think so?                                   |
| III. Difficulites that BHWs need to address for the prevention of NCDs     |                                                                                                        |                                                                                  |
| 1.                                                                         | What are the biggest challenges for the NCDs prevention in the community for community health workers? | -Please explain more detail.<br>-Why do you think so?                            |
| 2.                                                                         | Please explain your opinions why individuals have difficulty in preventing NCDs in the community?      | -Pleasse explain more detail.<br>-What do you need to improve the problems? Why? |
